# Supplementary material for: Extensively Hydrolyzed Formula Improves Allergic Symptoms in the Short Term in Infants with Suspected Cow’s Milk Protein Allergy
Source: MDPI journal article supplement (doi:10.3390/nu15071677), 2023-03-30
Supplement: s1 [file s1]

## Supplemental Figures: Symptom improvement p values

| Nutramigen          | Not assessed | Not present | Low   | Moderate | Severe |
|---------------------|--------------|-------------|-------|----------|--------|
| Burping             | 0.482        | 0.000       | 0.000 | 0.000    | 0.004  |
| Abdominal pain      | 0.365        | 0.000       | 0.000 | 0.000    | 0.002  |
| Regurgitation       | 0.761        | 0.000       | 0.011 | 0.000    | 0.000  |
| Diarrhea            | 0.313        | 0.000       | 0.000 | 0.000    | 0.000  |
| Constipation        | 0.149        | 0.002       | 0.614 | 0.001    | 0.082  |
| Nausea              | 0.138        | 0.000       | 0.001 | 0.000    | 0.082  |
| Decreased appetite  | 0.805        | 0.000       | 0.000 | 0.000    | 0.014  |
| Bloody/mucus stools | 0.482        | 0.000       | 0.000 | 0.000    | 0.000  |
| Vomiting            | 0.313        | 0.000       | 0.000 | 0.000    | 0.000  |

**Figure S1.** P-values for Visit 1 and 2 symptom improvement for gastrointestinal symptoms for infants  $\leq 6$  months of age with diagnosed or suspected CMPA. Note: ‘-’ denotes undefined p-values (null entries across visits).

| Nutramigen         | Not assessed | Not present | Low   | Moderate | Severe |
|--------------------|--------------|-------------|-------|----------|--------|
| Angioedema         | 0.867        | 0.125       | 0.004 | -        | 0.318  |
| Allergic urticaria | 0.856        | 0.007       | 0.004 | 0.008    | 0.157  |
| Itching            | 0.174        | 0.000       | 0.000 | 0.000    | 0.000  |
| Erythema           | 0.018        | 0.000       | 0.000 | 0.000    | 0.002  |
| Dry skin           | 0.126        | 0.000       | 0.564 | 0.000    | 0.000  |
| Rash / eczema      | 0.103        | 0.000       | 0.000 | 0.000    | 0.000  |

**Figure S2.** P-values for Visit 1 and 2 symptom improvement for skin symptoms for infants  $\leq 6$  months of age with diagnosed or suspected CMPA. Note: ‘-’ denotes undefined p-values (null entries across visits).

| Nutramigen          | Not assessed | Not present | Low   | Moderate | Severe |
|---------------------|--------------|-------------|-------|----------|--------|
| Laryngeal edema     | 0.426        | 0.199       | 0.100 | -        | -      |
| Shortness of breath | 0.763        | 0.277       | 0.360 | 0.157    | 0.318  |
| Wheezing            | 0.860        | 0.296       | 0.523 | 0.045    | 0.157  |
| Nasal obstruction   | 0.597        | 0.250       | 0.014 | -        | -      |
| Chronic cough       | 0.848        | 0.060       | 0.022 | 0.563    | 0.082  |
| Running nose        | 0.503        | 0.157       | 0.103 | 0.045    | -      |

**Figure S3.** P-values for Visit 1 and 2 symptom improvement for respiratory symptoms for infants  $\leq 6$  months of age with diagnosed or suspected CMPA. Note: ‘-’ denotes undefined p-values (null entries across visits).

| Nutramigen                    | Not assessed | Not present | Low   | Moderate | Severe |
|-------------------------------|--------------|-------------|-------|----------|--------|
| Profuse sweating after a meal | 0.856        | 0.008       | 0.000 | 0.157    | -      |
| Conjunctival redness          | 0.686        | 0.007       | 0.001 | 0.157    | -      |
| Pallor, pale skin color       | 1.000        | 0.006       | 0.003 | 0.045    | 0.318  |
| Watery eyes                   | 0.320        | 0.001       | 0.002 | 0.045    | -      |
| Abnormal growth/weight gain   | 0.105        | 0.000       | 0.000 | 0.000    | 0.001  |

**Figure S4.** P-values for Visit 1 and 2 symptom improvement for other symptoms for infants  $\leq 6$  months of age with diagnosed or suspected CMPA. Note: ‘-’ denotes undefined p-values (null entries across visits).
